# Supplementary material for: The timing of the Ellesmerian Orogeny in Svalbard: A review
Source: Copernicus journal article supplement (doi:10.5194/se-2022-14), 2022-03-01
Supplement: Supplementary file [file se-2022-14-RC2-supplement.pdf]

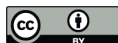

# The timing of the Ellesmerian Orogeny in Svalbard: A

## review

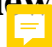

Jean-Baptiste P. Koehl<sup>1,2,3,4</sup>, John E. A. Marshall<sup>5</sup>, Gilda Lopes<sup>6</sup>

5 <sup>1</sup>Department of Geosciences, UiT The Arctic University of Norway in Tromsø, N-9037 Tromsø, Norway.

<sup>2</sup>CAGE – Centre for Arctic Gas Hydrate, Environment and Climate, NO-9037 Tromsø, Norway.

<sup>3</sup>Department of Geosciences, University of Oslo, P.O. Box 1047 Blindern, NO-0316 Oslo, Norway.

<sup>4</sup>Research Centre for Arctic Petroleum Exploration (ARCEX), University of Tromsø, N-9037 Tromsø, Norway.

10 <sup>5</sup>School of Ocean and Earth Science, University of Southampton, National Oceanography Centre, European Way, Southampton SO14 3ZH, UK.

<sup>6</sup>CIMA – Centre for Marine and Environmental Research, Universidade do Algarve, Campus de Gambelas, 8005-139, Faro, Portugal.

**Correspondence:** Jean-Baptiste P. Koehl (jeanbaptiste.koehl@gmail.com)

## 15 Abstract

In the Late Devonian–earliest Mississippian, Svalbard was affected by a short-lived episode of deformation named the Ellesmerian (Svalbardian) Orogeny. This event resulted in intense folding and thrusting in Devonian sedimentary successions. Deformation stopped prior to the deposition of Carboniferous–Permian sedimentary strata of the Billefjorden and Gipsdalen groups, which lie unconformably over folded Devonian strata. Later on, presumed Ellesmerian structures were reworked during Eurekan tectonism in the early Cenozoic and partly eroded. At present, record of Ellesmerian deformation is only preserved in narrow N–S-trending belts in central–northern, western and southern Spitsbergen. Despite extensive field studies, the timing of the Ellesmerian Orogeny is poorly constrained, and remains a matter of debate in places because of conflicting ages and because of the complex tectonic history of Svalbard. The present contribution aims at reviewing and discussing all available age constraints for Ellesmerian tectonism in Svalbard, which has great implications for the plate tectonic reconstructions of Arctic regions and for the tectonic history of Svalbard.

## 30 1. Introduction

The Ellesmerian Orogeny, also known as the Innuitian or Svalbardian Orogeny, refers to a short-lived episode of contraction–transpression that affected all levels of the crust and occurred in



the Late Devonian (–earliest Mississippian?) when parts of the tectonic plates now constituting most of the Arctic (Laurentia and Baltica) collided with each other and deformed Proterozoic to  
35 mid-Paleozoic sedimentary basins and basement rocks in northeastern Russia (Malyshev et al.,  
2011; Luchitskaya et al., 2015), Canada (Tuckwell et al., 1973, 1991; Embry and Klovan, 1976; Embry,  
1991; Harisson, 1995; Harisson and Brent, 2005; Piepjohn et al., 2008, 2013; Piepjohn and von  
Gosen, 2017) and Alaska (Grantz and May, 1984; Lane, 2007; Kumar et al., 2011), Proterozoic–  
40 Silurian metasedimentary rocks in northern and northeastern Greenland (Higgins et al., 2000;  
Piepjohn et al., 2015), and Devonian collapse basins and Precambrian–lower Paleozoic basement  
in Norway (Roberts, 1983; Osmundsen et al., 1998) and Svalbard (Vogt, 1938; Harland et al., 1974;  
McCann, 2000; Piepjohn, 2000; Piepjohn et al., 2000; Figure 1).

In Svalbard, Ellesmerian contraction (transpression?) followed the Caledonian Orogeny  
and led to the final accretion of Svalbard’s three basement terranes (Harland and Wright, 1979;  
45 Ohta et al., 1989, 1995; Harland et al., 1992; Gee and Page, 1994). Although early accounts  
envisioned hundreds–thousands of kilometer-scale strike-slip movements along N–S-striking  
faults like the Billefjorden and Lomfjorden fault zones (e.g., Harland et al., 1974, 1992), more  
recent studies have shown that such large scale strike-slip movements are unlikely (McCann, 2000;  
Piepjohn, 2000; Michalski et al., 2012). Evidence of Ellesmerian tectonism include dominantly  
50 west-verging folds and thrusts within several kilometer-thick, Devonian, late–post-orogenic,  
collapse-related sedimentary rocks in central–northern Spitsbergen (Andrée Land Group including  
the Mimerdalen Subgroup; Vogt, 1938; Harland et al., 1974; Manby and Lyberis, 1992; Manby et  
al., 1994; Friend et al., 1997; Piepjohn and Dallmann, 2014; Dallmann and Piepjohn, 2020) and  
dominantly east-verging folds and thrusts in Devonian (–Middle Mississippian?) sedimentary  
55 rocks in southern Spitsbergen (Marietoppen and Adriabukta formations; Dallmann, 1992; Bergh et  
al., 2011).

Shortly after the end of Ellesmerian deformation, partly eroded Devonian sedimentary  
rocks in Spitsbergen were covered by fluvial, coal-rich deposits of the Billefjorden Group and  
shallow marine strata of the Gipsdalen Group deposited within narrow, kilometer- to tens of  
60 kilometer-wide, N–S- to NW–SE-trending basins (Cutbill and Challinor, 1965; Maher Jr., 1996;  
McCann and Dallmann, 1996; Braathen et al., 2011; see Figure 2 for stratigraphy). Subsequently,  
Ellesmerian structures were reworked by Eureka contraction–transpression during the opening of  
the Labrador Sea and Baffin Bay between Canada and Greenland (Chalmers and Pulvertaft, 2001;



Oakey and Chalmers, 2012), which resulted in the formation of the West Spitsbergen Fold-and-  
65 Thrust Belt between Kongsfjorden and Sørkapp (Harland, 1969; Lowell, 1972; Harland and  
Horsfield, 1974; Maher et al., 1986; Dallmann et al., 1988, 1993; Andresen et al., 1994; Bergh and  
Grogan, 2003; see location in Figure 1) and of the Central Tertiary Basin in central Spitsbergen  
(Larsen, 1988; Petersen et al., 2016). As a result, Ellesmerian structures were overprinted and  
reworked and now commonly display the same trends, plunges, strikes, dips and kinematics as  
70 Eureka structures throughout the Arctic and, in many occurrences, coincide with and are  
indistinguishable from Eureka structures (e.g., Birkenmajer, 1964; Piepjohn et al., 2007, 2008,  
2013, 2015; Bergh et al., 2011; Piepjohn and von Gosen, 2017; Dallmann and Piepjohn, 2020).

At present, original Ellesmerian deformation is preserved only in a few narrow N–S-  
trending belts, including  Dickson Land (Michaelsen et al., 1997; Piepjohn et al., 1997b;  
75 Michaelsen, 1998; Piepjohn, 2000), Andrée Land (Dallmann and Piepjohn, 2020), and  
Blomstrandhalvøya (Thiedig and Manby, 1992; Buggisch et al., 1994; Figure 1). The best and most  
well-constrained example of Ellesmerian tectonism is observed in central–northern Spitsbergen,  
where folded Lower to lowermost Upper Devonian sedimentary rocks of the Andrée Land Group  
and Mimerdalen Subgroup are unconformably overlain by apparently undeformed uppermost  
80 Devonian–lowermost Permian sedimentary strata of the Billefjorden and Gipsdalen groups (Vogt,  
1938; Harland et al., 1974; Piepjohn, 2000; Piepjohn et al., 2000).

Recent U–Th–Pb geochronology on monazite grains yielded 373–355 Ma (latest  
Devonian–earliest Mississippian) ages for amphibolite facies metamorphism along a gently west-  
dipping shear zone in Prins Karls Forland (location in Figure 1) crosscutting Neoproterozoic  
85 basement rocks. These data provide evidence and time constraints for Ellesmerian tectonism at  
depth of c. 15 kilometers (Faehnrich et al., 2017; Majka and Kościńska, 2017; Schneider et al.,  
2018; Kościńska et al., 2020). Potential Ellesmerian (greenschist) facies metamorphism and  
mylonitization was also potentially identified in Oscar II Land (location in Figure 1) and dated to  
365–344 Ma through  $^{40}\text{Ar}$ – $^{39}\text{Ar}$  and U–Th–Pb geochronology (Barnes et al., 2020).

90 Nonetheless, despite extensive previous works, Ellesmerian tectonism at shallow crustal  
levels lacks accurate time constraints and, in places, it is possible that structures ascribed to this  
event may have formed during the early Paleozoic Caledonian Orogeny or during the early  
Cenozoic Eureka tectonic event (Rippington et al., 2010). For example, east- to northeast-  
plunging folds trending parallel to the inferred late–post-orogenic extension direction in Middle



95 Devonian collapse basins in western Norway were initially interpreted as Late Devonian–  
Mississippian, Ellesmerian contractional–transpressional structures (Roberts, 1983). These are  
now known to have formed as transtensional folds during extensional collapse of the Caledonides  
(Chauvet and Séranne, 1994; Osmundsen and Andersen, 1994; Fossen et al., 2013). Thus, it is  
paramount to carefully constrain the timing of Ellesmerian deformation throughout the Arctic to  
100 be able to evaluate the extent and impact of this tectonic event from a regional perspective.

Thus far, Ellesmerian deformation is thought to have initiated in the Late Devonian–Early  
Mississippian, possibly in the late Frasnian–Famennian (Vigran, 1964; Allen, 1965, 1973; Pcelina  
et al., 1986; Brinkmann, 1997; Schweitzer, 1999; Piepjohn et al., 2000; Figure 2). The onset of  
deformation was presumably recorded by the deposition and syn-depositional deformation of  
105 coarse-grained sedimentary rocks of the Mimerdalen Subgroup in the late Famennian  
(Planteryggen and Plantekløfta formations in Figure 2; Piepjohn and Dallmann, 2014).  
Deformation is believed to have stopped prior to the deposition of sedimentary rocks of the  
Billefjorden Group in the late Tournaisian (Vogt, 1938; Piepjohn, 2000).

The present contribution focuses on the debate around the timing of Ellesmerian tectonism  
110 throughout Spitsbergen. In northern Spitsbergen, Ellesmerian deformation was constrained to the  
late Famennian–earliest Mississippian by the identification of one specimen of *Retispora  
lepidophyta* in folded rocks of the Plantekløfta Formation (Schweitzer, 1999; Piepjohn et al., 2000).  
However, recent palynological and paleontological studies in northern–central Spitsbergen suggest  
slightly revised ages for the stratigraphic units used to constrain the timing of the Ellesmerian  
115 Orogeny, including a Middle Devonian (minimum upper Givetian) age for rocks of the Tordalen  
Formation (Mimerdalen Subgroup; Berry and Marshall, 2015; Newman et al., 2019) and a mid  
Famennian age for the base of the Billefjorden Group (Scheibner et al., 2012; Lindemann et al.,  
2013; Marshall et al., 2015; Gilda M. Lopes pers. obs., 2019). In addition, the timing of Ellesmerian  
deformation varies somewhat from north to south in Spitsbergen, and study of a palynological  
120 assemblage in the Adriabukta Formation in southern Spitsbergen constrained Ellesmerian folding  
and faulting to the Viséan (Middle Mississippian; Birkenmajer and Turnau, 1962; Figure 2). The  
present contribution reviews time constraints for Ellesmerian tectonism in central–northern,  
southern, and western Svalbard and briefly discusses their implications.

Constraining the timing of the Ellesmerian Orogeny in Svalbard with accuracy is of  
125 importance for paleogeographic and plate tectonics reconstructions in the Arctic. It is also



important for the tectonic history of Svalbard, e.g., to evaluate potential interplay between late–  
post-Caledonian extensional collapse, which resulted in the deposition of several kilometers thick  
collapse basins (e.g., Murascov and Mokin, 1979; Manby and Lyberis, 1992; Friend et al., 1997;  
Braathen et al., 2018), and contractional tectonic processes that resulted in intense folding of these  
130 deposits (Vogt, 1938; Piepjohn, 2000; Dallmann and Piepjohn, 2020). Furthermore, the present  
study has implications for the methods used by geologists to interpret tectonic events worldwide.

## Review of age constraints in northern and central Spitsbergen

### *Age of the Mimerdalen Subgroup*

135 The identification of one specimen of *Retispora lepidophyta* within strata of the  
Plantekløfta Formation by Brinkmann (1997, his table 14.3) and Piepjohn et al. (2000; published  
in Schweitzer, 1999, plate 6 in their figure 10 and plate 7 in their figure 1) suggests a late Famennian  
age for the top fo the Plantekløfta Foramtion and, hence, that Ellesmerian tectonism terminated  
during the Famennian–Tournaisian in northern and central Spitsbergen.

140 Recent studies clearly demonstrated that the interpretation of *Retispora lepidophyta* by  
Brinkmann (1997), Schweitzer (1999) and Piepjohn et al. (2000) is erroneous. Notably, the lone  
figured specimen interpreted as *Retispora lepidophyta* by Schweitzer (1999) and Piepjohn et al.  
(2000) differs in size and shows significantly different morphological structures from typical  
*Retispora lepidophyta* (Playford, 1976; Berry and Marshall, 2015, their supplement DR3). In  
145 addition the fovea that characterise the spore’s exoexine appear to be the result of damage by cubic  
diagenetic pyrite. Attempts have been made to locate the *Retispora lepidophyta* specimen figured  
in Brinkmann (1997) and Schweitzer (1999) and used by Piepjohn et al. (2000) to date Ellesmerian  
tectonism in central Spitsbergen for further analysis. These attempts were unfortunately  
unsuccessful (John E. A. Marshall pers. obs., 2020).

150 Berry and Marshall (2015) re-evaluated the age of the Plantekløfta Formation to be early  
Frasnian based on fossils and miospores (ca. 383–380 Ma; see also their supplements; Figure 2).  
In addition, the paleontological study of Newman et al. (2019, 2020, 2021) recorded the presence  
of articulated fish in the Fiskekløfta Member of the Tordalen Formation (Figure 2), i.e.,  
undoubtedly *in situ* fossils, demonstrating a late–latest Givetian (ca. 385–383 Ma; Middle  
155 Devonian) age for this stratigraphic unit instead of late Famennian. If the relatively coarser grain-  
size of the sedimentary deposits of the Plateryggen and Plantekløfta formations indeed reflects the



onset of Ellesmerian tectonism as suggested by Piepjohn and Dallmann (2014), the new paleontological–palynological ages constrain the initial phase of the Ellesmerian Orogeny at 383–380 Ma.

160 A late Famennian age for the Plantekløfta Formation based on the lone specimen of *Retispora lepidophyta* in central Spitsbergen is the only contradictory evidence against a mid Famennian age for the base of the Billefjorden Group and older age for the Mimerdalen Subgroup (Scheibner et al., 2012; Lindeman et al., 2013; Berry and Marshall, 2015; Marshall et al., 2015; Lopes et al., 2019; Newman et al., 2019; Gilda M. Lopes pers. obs., 2019).

165

#### ***Age of the Billefjorden Group***

Recent palynological studies in central Spitsbergen dated the base of the Billefjorden Group in Triungen (see Figure 1 for location) to the mid Famennian (maximum ca. 365 Ma; Lindemann et al., 2013; Marshall et al., 2015; Gilda M. Lopes pers. obs., 2019; Figure 2). At least 30 samples  
170 contained characteristic Famennian spore assemblages including *Cyrtospora cristifer*, *Cornispora monocornata*, *Cornispora bicornata*, *Cornispora tricornata*, *Lophozonotriletes lebedianensis*, *Knoxisporites dedaleus*, *Grandispora gaudalis*, *Spelaeotriletes papulosus*, *Cristatisporites lupinovitchi*, *Lagenosisporites* sp., *Grandispora famensis* and *Tergobulasporites immensus* (Marshall et al., 2015). Some samples from the lower part of the Billefjorden Group in Billefjorden  
175 also contained *Retispora lepidophyta* (Gilda M. Lopes obs. comm., 2019). These spore assemblages were also identified in sedimentary rocks in the lower part of the Billefjorden Group in northeastern Spitsbergen (Scheibner et al., 2012), thus strengthening a Famennian age for the base of this stratigraphic unit throughout northern and central Spitsbergen. Note that the base of the Billefjorden Group in Bjørnøya also was also dated as Famennian based on palynology (Kaiser,  
180 1970; Worsley and Edwards, 1976; Lopes et al., 2021). This strongly suggests that the Ellesmerian deformation, which ended prior to the deposition of the Billefjorden Group (Piepjohn, 2000), must have been terminated by the mid Famennian in central–northern Spitsbergen. This implies a maximum duration of 18 Ma for this tectonic event.

Piepjohn and Dallmann (2014) proposed that the mid–late Famennian spores identified in  
185 the lower part of the Billefjorden Group were reworked based on their identification of one specimen of *Retispora lepidophyta* within the Plantekløfta Formation (Piepjohn et al., 2000). However, since this specimen clearly is a misidentification (Berry and Marshall, 2015, their

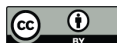

supplement DR3), the claim of reworking of mid–late Famennian spores found within the base of the Billefjorden Group in Triungen is no longer valid

190

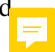

### ***Other time constraints for deformation in central–northern Spitsbergen***

At least some of the deformation in Lower to lowermost Upper Devonian strata of the Andrée Land Group and Mimerdalen Subgroup in central and northern Spitsbergen is early Cenozoic in age because uppermost Devonian–Mississippian strata of the Billefjorden Group, which overlie the Andrée Land Group and Mimerdalen Subgroup in the area, are intensely sheared top-west, e.g., in Pyramiden (Koehl, 2021) and Garmdalen (Koehl et al., 2020, 2022 submitted; locations in Figure 1). This is further supported by the interpretation of seismic data adjacent nearshore portions of Billefjorden showing the presence of a bedding-parallel décollement between the Wood Bay Formation and the Gipsdalen Group (Koehl et al., 2020; Koehl et al., 2022 in prep.). These suggest a significant impact of strain partitioning during Eurekan deformation. Eurekan strain partitioning is further illustrated by tight plastic folding of Lower Devonian strata of the Andrée Land Group and brittle brecciation of the unconformity with Upper Pennsylvanian–Permian strata in Yggdrasilkampen (Manby et al., 1994 their figure 11), and by décollements within Middle Devonian deposits near the Billefjorden Fault Zone in Wijdefjorden (John E. A. Marshall pers. obs., 2022; see Figure 1 for location).

205

Another argument corroborating these data is the involvement in folding of Carboniferous picritic dykes dated at ca. 357 Ma (Evdokimov et al., 2006; monchiquite dykes in Gayer et al., 1966 and Manby and Lyberis, 1996) intruding Lower Devonian sedimentary rocks at Krosspynten (see location in Figure 1).

210

In addition, part of the deformation recorded by Lower to lowermost Upper Devonian strata of the Andrée Land Group and Mimerdalen Subgroup is possibly related to extensional detachment folding in the Devonian (Chorowicz, 1992; Roy, 2007, 2009; Roy et al., unpublished). This is also supported by recent field and geochronological studies in northwestern Spitsbergen (Braathen et al., 2018, 2020).

215

Thus, it is unclear how much (if any at all) of the deformation observed within Lower to lowermost Upper Devonian strata of the Andrée Land Group and Mimerdalen Subgroup in central–northern Spitsbergen actually reflects Ellesmerian tectonism

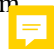



## Review of age constraints in southern Spitsbergen

### 220 *Age of the Adriabukta Formation*

In southern Spitsbergen, Lower–Middle Devonian sedimentary rocks of the Marietoppen Formation (time equivalent to the Pragian–Eifelian Wood Bay and Grey Hoek formations of the Andrée Land Group in central–northern Spitsbergen; Figure 2) unconformably overlie Precambrian–early Paleozoic basement rocks and are overlain by sedimentary strata of the  
225 Adriabukta Formation that were deformed into tight east-verging folds presumably during Ellesmerian tectonism. The age of the Adriabukta Formation was dated to the Middle Mississippian through analysis of palynomorphs from black shales at the base and within the Formation (Birkenmajer and Turnau, 1962; Figure 2). Dallmann et al. (1999) noted that because of the age discrepancy between the Middle Mississippian Adriabukta Formation and the Lower to lowermost  
230 Upper Devonian Andrée Land Group in central–northern Spitsbergen, the folding of the Adriabukta Formation could not be correlated to Svalbardian folding. Nevertheless, in 2011, W. Dallmann suggested that the Adriabukta Formation is actually Late Devonian in age based on structural correlation between presumed Ellesmerian structures in the Adriabukta Formation and Ellesmerian fold-and-thrust belts in central–northern Spitsbergen, thus generating a  
235 ~~discussion~~debate around the actual age of the formation. This is referenced as “W. Dallmann pers. comm. 2009” in Bergh et al. (2011).

The discussion initiated by W. Dallmann around the age of the Adriabukta Formation is neither based on published material nor on specific scientific evidence. By contrast, Birkenmajer and Turnau (1962) identified a count of 350 spore specimens from the Adriabukta Formation  
240 including specimens of *Lycospora*, *Tripartites* and *Triquitrites*, which ~~were then and~~ are still characteristic of the Middle Mississippian (Hughes and Playford, 1961; Playford, 1962, 1963; Clayton 1996). Later palynological studies in Svalbard (Billefjorden; Lopes et al., 2019) and Europe (Clayton et al., 1977) corroborate the Middle Mississippian ages obtained by Birkenmajer and Turnau (1962) for the Adriabukta Formation. Thus, the ~~speculation~~~~debate~~ around the Middle  
245 Mississippian ages obtained for the Adriabukta Formation by Birkenmajer and Turnau (1962) is ~~not justified and a Middle Mississippian age~~ is entirely justified. The Adriabukta Formation in southern Spitsbergen is therefore a time-equivalent of the Billefjorden Group (e.g., Lopes et al., 2019).





The Middle Mississippian age of the Adriabukta Formation suggests that folding within  
250 this stratigraphic unit cannot be Late Devonian and is therefore not related to Ellesmerian  
tectonism. A more likely origin for deformation within the Adriabukta Formation is the early  
Cenozoic Eurekan tectonic event. The tightly folded character of the Adriabukta Formation was  
previously proposed to be related to the dominance of weak shale and to Cenozoic strain  
partitioning by Birkenmajer and Turnau (1962). This scenario is now the most likely explanation  
255 for differential deformation of shales of the Adriabukta Formation and for folding of the  
Marietoppen Formation in southern Spitsbergen.

#### *Age of the Hornsundneset Formation*

In Hornsundneset (Figure 1), Siedlecki and Turnau (1964) analyzed eight samples from the  
260 Hornsundneset and Sergeijevfjellet formations of the Billefjorden Group. They proposed a  
Serpukhovian (Late Mississippian) age based on palynological results. However, a re-evaluation  
of their results showed that the Billefjorden Group in Hornsundneset (location in Figure 1) is  
Middle Mississippian in age (Dallmann et al., 1999; Krajewski and Stempien-Salek, 2003), i.e.,  
contemporaneous with the Adriabukta Formation (Figure 2).

265 Interestingly, the Hornsundneset and Sergeijevfjellet formations are dominated by  
relatively hard, flat-lying beds of sandstone. Though located closer to the early Cenozoic collision  
zone with Greenland (i.e., within the West Spitsbergen Fold-and-Thrust Belt), these formations are  
relatively undeformed compared to the shale-dominated Adriabukta Formation (Siedlecki, 1960).  
This further supports a significant impact of strain partitioning on deformation patterns during the  
270 Eurekan tectonic event in southern Spitsbergen.

#### *Other time constraints*

In Adriabukta (location in Figure 1), the Adriabukta Formation is truncated by a major  
shear zone, the Mariekammen Shear Zone, which comprises hundreds of meter-long lenses of  
275 Cambrian metasedimentary basement rocks, shows a top-east reverse sense of shear, and is  
unconformably overlain upwards by mildly folded Pennsylvanian strata of the Gipsdalen Group  
(Hyrnefjellet Formation), thus possibly reflecting Ellesmerian tectonism (Birkenmajer and Turnau,  
1962; Birkenmajer, 1964; Dallmann, 1992; Bergh et al., 2011). However, these previous studies  
did not account for the impact of Eurekan tectonism in southern Spitsbergen. A simple restoration



280 of the shear zone prior to Eurekan deformation shows that, if this structure is indeed Mississippian  
in age, it must have formed as a normal fault and therefore cannot reflect Ellesmerian contractional  
deformation (Supplement S1). It should be noted that other workers proposed that the  
Mariekammen Shear Zone formed as an early Cenozoic structure (Dallmann, 1992; von Gosen and  
Piepjohn, 2001).

285 The Adriabukta Formation was intruded by two, thin, bedding-parallel, Early Cretaceous  
dolerite sills of the Diabasodden Suite (Senger et al., 2013) that are folded together with bedding  
surfaces (Birkenmajer and Morawski, 1960; Birkenmajer, 1964). If the Adriabukta Formation was  
already folded in the Early Cretaceous, the sills would have truncated both fold structures and  
bedding surfaces. For sills to intrude along bedding surfaces, these must have remained relatively  
290 undeformed, sub-planar, and sub-horizontal until the Early Cretaceous. The Early Cretaceous sills  
and Middle Mississippian sedimentary strata were then folded together during subsequent Eurekan  
deformation. The two Early Cretaceous sills therefore further constrain the age of folding within  
the Adriabukta Formation and Marietoppen Formation to the early Cenozoic.

An early Cenozoic age for folding of shales of the Adriabukta Formation is further  
295 suggested by similar tight, east-verging fold geometries in Lower Triassic sedimentary strata  
incorporated as lenses into basement rocks in Fiskeknatten (locaton shown in Figure 1;  
Birkenmajer, 1964).

Ellesmerian deformation may be recorded in southernmost Spitsbergen (Røkensåta; Figure  
1 for location) where two outcrops of limited geographical extent ( $\ll$  one km<sup>2</sup>) show poorly  
300 exposed, gently dipping, shale-rich, Lower Triassic sedimentary rocks over folded Middle  
Devonian strata (Dallmann, 1992). However, the two outcrops are of small size because extensively  
eroded and the stratigraphic contact between Devonian and Triassic rocks is completely covered  
by loose material and located on steep mountain flanks (i.e., inaccessible for detailed inspection).  
In addition, Triassic successions in Spitsbergen dominantly consist of shale (Worsley and Mørk,  
305 1978), and strain partitioning during early Cenozoic contraction is now known to have had a  
considerable influence on the deformation of shale units in southern Spitsbergen (e.g., tightly  
folded Middle Mississippian Adriabukta Formation versus undeformed Middle Mississippian  
Hornsundneset Formation; Siedlecki, 1960; Birkenmajer and Turnau, 1962). Furthermore, folds  
within Middle Devonian rocks in Røkensåta appear to die out upwards (see figure 4a in Dallmann,  
310 1992). It is therefore possible that deformation in Røkensåta is also early Cenozoic in age.



Such heavily eroded and limited outcrops need to be interpreted with extreme caution. Lower Triassic strata throughout Spitsbergen are well known for hosting bedding-parallel Eurekan décollements (Maher, 1984; Maher et al., 1986, 1989; Andresen et al., 1988; Bergh and Andresen, 1990; Haremo and Andresen, 1992; Andresen et al., 1992; Dallmann et al., 1993; Bergh et al., 1997). The most spectacular examples include the décollement in dark shales on the Midterhuken Peninsula (Maher, 1984; Dallmann et al., 1993; location shown in Figure 1) the Berzeliustinden thrust in southern Spitsbergen (Dallmann, 1988), the Triassic décollement penetrated by the 7816/12-1 exploration well and well imaged on seismic data in Reindalspasset (Eide et al., 1991; Koehl, 2021 his figure 5g; see Figure 1 for location), and the “Lower Décollement Zone” in eastern Spitsbergen (Andresen et al., 1992; Haremo and Andresen, 1992). A similar structure may very well have decoupled Eurekan deformation between folded Middle Devonian and overlying gently dipping Lower Triassic sedimentary strata in Røkensåta. This example stresses the importance of detailed inspection of extensively eroded outcrops, especially in glaciated Arctic areas, and highlights potential flaws in long-distance interpretation of kilometer-scale mountain flanks.

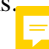

325

### **Review of age constraints in western Spitsbergen**

#### ***Conodont age in Blomstrandhalvøya***

In western Spitsbergen, Thiedig and Manby (1992) and Kempe et al. (1997) showed that west-verging thrusts crosscut Proterozoic and Devonian sedimentary rocks in Blomstrandhalvøya (location in Figure 1). They used the westwards transport direction of these thrusts to suggest that they record Ellesmerian tectonism because it is comparable to observations along inferred Ellesmerian thrusts in Dickson Land and Andrée Land in central–northern Spitsbergen (Vogt, 1938; Harland et al., 1974; Piepjohn, 2000).

In addition, Kempe et al. (1997) also noted the presence of small NW-verging thrusts on Blomstrandhalvøya. Notably, they argued that the size of these thrust was different from that of Ellesmerian structures and concluded that they must therefore be post-Devonian. Kempe et al. (1997) argued that, even though the NW-verging thrusts seemed to have formed in the early Cenozoic, NW-directed transport directions are not typical of early Cenozoic Eurekan tectonism, which produced NE-verging thrusts and folds in adjacent areas of Brøggerhalvøya (Bergh et al., 2000; Piepjohn et al., 2001; see location in Figure 1). They therefore proposed that NW-verging thrusts on Blomstrandhalvøya formed during a discrete tectonic event in the Pennsylvanian–



Cretaceous. However, such a tectonic event is, thus far, unheard of in Spitsbergen. It is therefore more likely that the NW-verging thrusts in Blomstrandhalvøya formed in the early Cenozoic.

345 In western Blomstrandhalvøya, one sample in a presumably undeformed karst infill within a few meters wide fissure in Proterozoic basement marbles yielded a Pennsylvanian–Permian age based on conodont fauna (Buggisch et al., 1994; Figure 2). Since the karst infill was apparently not deformed, Buggisch et al. (1994) argued that the conodont fauna potentially constrained the formation of folds and west-verging thrusts on Blomstrandhalvøya to the Late Devonian (Ellesmerian).

350 Nevertheless, several aspects of this feature call for caution regarding its bearing for Ellesmerian tectonism. First, despite being located in an area strongly deformed by Eurekan tectonism, e.g., Blomstrandhalvøya (e.g., NW-verging thrusts of Kempe et al., 1997) and Brøggerhalvøya; (Bergh et al., 2000; Piepjohn et al., 2001; Figure 1), the Pennsylvanian–Permian cave seems to have escaped early Cenozoic deformation. This is possibly due to partitioning of  
355 Eurekan strain, which is known to have had a significant influence on deformation patterns in Brøggerhalvøya (e.g., Bergh et al., 2000). Thus, this small-scale karst feature is not an appropriate marker to discuss the timing of regional tectonic events in Blomstrandhalvøya.

Second, the cave is located within relatively undeformed Proterozoic marbles, and away from presumed Ellesmerian west-verging thrusts and associated deformed Lower Devonian  
360 sedimentary rocks on Blomstrandhalvøya. Hence, the karst infill is inappropriate to constrain the timing of Ellesmerian deformation in Blomstrandhalvøya. The deformation in basement marble (if any at all at the location of the karst) could very well be Caledonian as previously suggested by Michalski (2018).

Third, the karst is the only one of its kind yielding a Pennsylvanian–Permian age and is, moreover, based on only one sample with a poorly preserved conodont fauna (Buggisch et al., 1994). In their study, Buggisch et al. (1994) specified that the assignment to published species was difficult due to the poor preservation of the elements. Hence, further studies of caves and conodont fauna on Blomstrandhalvøya are therefore needed to further assess the reliability of the age obtained by Buggisch et al. (1994) and its implication (if any at all) for Ellesmerian tectonism.  
370 Considering all pieces of evidence gathered thus far, the folds and thrusts in Proterozoic–Lower Devonian rocks in Blomstrandhalvøya may all be Caledonian and Eurekan in age since no appropriate constraints are available to date any potential Ellesmerian deformation.



### *Amphibolite facies metamorphism in Prins Karls Forland*

375 In Prins Karls Forland (see Figure 1 for location), amphibolite facies metamorphism was  
dated to 373–355 Ma by ion microprobe and  $^{40}\text{Ar}$ – $^{39}\text{Ar}$  geochronology, and was postulated to be  
prograde and, thus, to record deep-crustal Ellesmerian tectonism (c. 15 kilometers depth; Majka  
and Kościńska, 2017; Faehnrich et al., 2017; Schneider et al., 2018; Kościńska et al., 2020). This  
episode of deep-crustal metamorphism is coeval with shallow-crustal Ellesmerian tectonism in  
380 central–northern Spitsbergen dated to ca. 383–365 Ma by recent paleontological and palynological  
studies (Scheibner et al., 2012; Lindemann et al., 2013; Marshall et al., 2015; Berry and Marshall,  
2015; Newman et al., 2019; Gilda M. Lopes pers. obs., 2019).

However, kinematic indicators along the dated shear zone display top-SW to top-NW  
normal sense of shear (Schneider et al., 2018 their figure 3b, e and f), which is incompatible with  
385 a formation during contractional (Ellesmerian) tectonism. Instead, the shear sense rather suggests  
a close relationship with Devonian extensional collapse of the Caledonides. Notably, amphibolite-  
facies metamorphism in Prins Karls Forland is also coeval with and occurred at comparable depth  
as deep-crustal, late Caledonian, high-pressure metamorphism along the conjugate eastern–  
northeastern Greenland margin (Gilotti et al., 2004; McClelland et al., 2006; Augland et al., 2010,  
390 2011), which developed synchronously with the deposition of Devonian–Mississippian collapse  
basins along low-angle extensional detachments at the surface (Stemmerik et al., 1991, 1998, 2000;  
Larsen and Bengaard, 1991; Strachan, 1994; Larsen et al., 2008). During late–post-orogenic  
collapse, deep contractional tectonics occurring typically at greenschist–amphibolite-facies  
conditions (Snoke, 1980; Lister and Davis, 1989; Krabbendam and Dewey, 1998) are commonly  
395 associated with near-surface extension (Platt, 1986; Rey et al., 2001, 2011; Teyssier et al., 2005).

Amphibolite-facies metamorphism in Prins Karls Forland was also coeval with collapse-  
related core complex exhumation in northwestern Spitsbergen (latest movement at 368 Ma;  
Braathen et al., 2018). Hence, despite the postulated prograde character of amphibolite-facies  
metamorphism in Prins Karls Forland, its timing appears to coincide with Late Devonian  
400 extensional events in nearby areas. If the postulated prograde character of amphibolite-facies  
metamorphism in Prins Karls Forland is to be reconciled with the observed overall top-SW to top-  
NW normal sense of shear (Schneider et al., 2018 their figure 3b, e and f) and with extensional  
tectonics in northwestern Spitsbergen (Braathen et al., 2018), then the shear zone and associated



prograde metamorphism may reflect gradual burial linked to the deposition of thick collapse  
405 sediments and/or normal movements along the shear zone.

The geochronological ages obtained by Kościńska et al. (2020) show broad ranges (430–  
336 Ma for monazite population I, 419–261 Ma for population II, and 443–226 Ma for population  
III) all ranging from the Silurian (Caledonian?) to the Carboniferous–Triassic. In addition, the ages  
obtained are associated with large  $\sigma_1$  errors (12.4–20.2 Myr for population I, 19.6–49.9 Myr for  
410 population II, and 17.1–64.4 Myr for population III; see online supplement S1 in Kościńska et al.,  
2020). Since the length of Ellesmerian tectonism in shallow-crustal Lower to lowermost Upper  
Devonian sedimentary rock in central–northern Spitsbergen is constrained to a maximum time span  
of 18 million years (383–365 Ma), i.e., a time span comparable with the  $\sigma_1$  errors associated with  
the ages obtained by Kościńska et al. (2020), these ages are inappropriate to discuss the timing of  
415 Ellesmerian tectonism in Svalbard (Schaltegger et al., 2015).

Furthermore, since the Late Devonian–Mississippian (373–355 Ma) amphibolite-facies  
metamorphism in basement rocks in Prins Karls Forland probably occurred at c. 15 kilometers  
depth, the timing and nature of metamorphism may not have any implications for the nature of  
paleostress and resulting deformation in shallow-crustal Devonian sedimentary rocks in  
420 Spitsbergen (e.g., coeval ultra-high pressure metamorphism at depth and extensional collapse at  
the surface in Greenland in the Devonian–Mississippian; Strachan, 1994; Gilotti et al., 2004;  
McClelland et al., 2006).

### ***Greenschist facies metamorphism and thermal overprints in Oscar II Land***

In Oscar II Land (location in Figure 1), greenschist facies metamorphism yielded 365–344  
425 Ma  $^{40}\text{Ar}$ – $^{39}\text{Ar}$  and U–Th–Pb ages (Barnes et al., 2020) suggesting it potentially reflects Ellesmerian  
deformation. However, these ages were re-evaluated to ca. 410 Ma (Early Devonian; Ziemniak et  
al., 2020). This episode of low-grade metamorphism was therefore coeval with the deposition of  
Lower Devonian sedimentary rocks in central and northern Spitsbergen in the Devonian Graben  
430 during late–post-orogenic collapse of the Caledonides and, thus, is most likely related to  
extensional processes (Gee and Moody-Stuart, 1966; Friend et al., 1966; Friend and Moody-Stuart,  
1972; Murascov and Mokin, 1979; Manby and Lyberis, 1992; Friend et al., 1997; McCann, 2000).

In addition, Michalski et al. (2017) evidenced two episodes of thermal overprints at 377–  
326 and ca. 300 Ma in pre-Caledonian rocks in Oscar II Land using  $^{40}\text{Ar}$ – $^{39}\text{Ar}$  geochronology. The



435 latter event is believed to be related to rifting. The former event at 377–326 Ma partly overlaps  
with the presumed timing of the Ellesmerian Orogeny in central–northern Spitsbergen at ca. 383–  
365 Ma (Scheibner et al., 2012; Lindemann et al., 2013; Marshall et al., 2015; Berry and Marshall,  
2015; Newman et al., 2019; Gilda M. Lopes pers. obs., 2019) and with the timing of 373–355 Ma  
440 amphibolite facies metamorphism in western Spitsbergen (Majka and Kościńska, 2017; Faehnrich  
et al., 2017; Schneider et al., 2018; Kościńska et al., 2020). It is, however, not possible to infer  
tectonic stress orientation and this event may very well be related to Ellesmerian tectonism or to  
late Caledonian extensional processes in northeastern Greenland and Prins Karls Forland  
(Stemmerik et al., 1991, 1998, 2000; Larsen and Bengaard, 1991; Strachan, 1994; Larsen et al.,  
2008; Schneider et al., 2018; see also previous section) and in northern Spitsbergen (Chorowicz,  
445 1992; Roy, 2007, 2009; Braathen et al., 2018, 2020; Roy et al., unpublished).

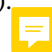

### Discussion and re-evaluation of the timing and extent of Ellesmerian tectonism

The present brief review of age constraints in Spitsbergen shows a few noteworthy aspects  
of dating Ellesmerian tectonism in Svalbard. In southern Spitsbergen, Middle Mississippian  
450 palynological ages for the tightly folded, shale-rich Adriabukta formation (Birkenmajer and  
Turnau, 1962) and its intrusion by two Early Cretaceous dolerite sills that are folded together with  
bedding surfaces (Birkenmajer and Morawski, 1960; Birkenmajer, 1964) show that folding in this  
area may be exclusively and entirely early Cenozoic in age. Comparable Middle Mississippian  
palynological ages for the contemporaneous but undeformed, sandstone-dominated Hornsundneset  
455 Formation c. 20 kilometers to the southwest (Siedlecki, 1960; Siedlecki and Turnau, 1964) and  
mild folding of clastic-rich Pennsylvanian–Permian rocks in Adriabukta (Birkenmajer, 1964;  
Bergh et al., 2011) illustrate the strong impact of Eurekan strain partitioning on deformation  
patterns in southern Spitsbergen as previously considered by Birkenmajer and Turnau (1962) and  
Koehl (2020a).

460 The only possible record of Ellesmerian tectonism in southern Spitsbergen occurs at  
Røkensåta. However,  as previously discussed, the low quality of the only two exposures  
(stratigraphic contact covered by loose material), their very limited extent ( $\ll$  one km<sup>2</sup>), their  
inaccessibility for detailed inspection (located on steep mountain flanks), the significant impact of  
early Cenozoic strain partitioning in southern Spitsbergen (Birkenmajer and Turnau, 1962), and  
465 the geometry of folds within Middle Devonian rocks at this locality (dying out upwards; Dallmann,



1992) call for caution and further detailed investigation of structural and stratigraphic relationships at this locality. Nevertheless, if Eurekan tectonism alone produced the intense deformation in Adriabukta, it is possible that deformation in Røkensåta is exclusively early Cenozoic as well.

In central–northern Spitsbergen, Ellesmerian tectonism was constrained to ca. 383–365 Ma  
470 (i.e., a maximum duration of 18 million years) by recent paleontological and palynological studies in sedimentary rocks of the Mimerdalen Subgroup (Berry and Marshall, 2015; Newman et al., 2019, 2020, 2021) and Billefjorden Group (Scheibner et al., 2012; Lindemann et al., 2013; Marshall et al., 2015; Gilda M. Lopes pers. obs., 2019). The only contradictory late Famennian age obtained by Piepjohn et al. (2000) via identification of one specimen of *Retispora lepidophyta* in one sample  
475 of the Plantekløfta Formation of the Mimerdalen Subgroup is now known to be a clear misidentification (Berry and Marshall, 2015 their supplement DR3).

Despite the accurate paleontological–palynological time constraints for Ellesmerian tectonism in central–northern Spitsbergen, no geochronological constraints exist yet for discrete Ellesmerian structures. In addition, the central–northern Spitsbergen area was strongly affected by  
480 early Cenozoic Eurekan tectonism during which strain partitioning played an important role in localizing deformation in weak, shale-rich lithostratigraphic units like the Billefjorden Group (e.g., Koehl, 2021). Moreover, evidence for extensional detachment-related folding in northerwestern (Braathen et al., 2018, 2020) and northern Spitsbergen (Chorowicz, 1992; Roy, 2007, 2009; Roy et al., unpublished) in Middle–Late Devonian may also have contributed to deformation patterns  
485 observed within Lower to lowermost Upper Devonian strata of the Andrée Land Group and Mimerdalen Subgroup. Thus, it is unclear how much (if any at all) of the deformation observed within Lower to lowermost Upper Devonian strata in central–northern Spitsbergen actually reflects Ellesmerian tectonism. Further studies are therefore clearly needed to quantify the impact of the Ellesmerian Orogeny and to segregate discrete Ellesmerian from Devonian extensional  
490 (detachment) faulting and folding and from early Cenozoic Eurekan folding and thrusting.

Another line of controversy is the incredibly rapid switch from extension-related normal faulting in the Early–Middle Devonian to Ellesmerian contraction in the Late Devonian, and back to dominantly extensional setting in the mid Famennian in central–northern Spitsbergen. Notably, the Wood Bay Formation and Fiskekløfta Member of the Tordalen Formation are downfaulted by  
495 normal faults in southern Hugindalen and unconformably covered by the Planteryggen Formation (Hugindalen Phase in Piepjohn, 2000 and Dallmann and Piepjohn, 2020). The Fiskekløfta Member





was dated to the latest Givetian (top of the unit at ca. 383 Ma) and the Plantekløfta Formation to the early Frasnian (383–380 Ma; Berry and Marshall, 2015; Newman et al., 2019, 2020, 2021). Since the conglomeratic beds of the Planteryggen and Plantekløfta formations are advocated by  
500 Piepjohn and Dallmann (2014) to reflect the onset of Ellesmerian tectonism, this would therefore imply an abrupt switch in plate tectonic movements and stresses at exactly 383 Ma, i.e., completed within one million year maximum. In addition, mid Famennian–Upper Mississippian sedimentary rocks of the Billefjorden Group and Pennsylvanian–lower Permian rocks of the Gipsdalen Group, which overlie the Andrée Land Group in central–northern Spitsbergen, are believed to have been  
505 deposited in extensional basins (Cutbill et al., 1976; Aakvik, 1981; Gjelberg, 1984; Braathen et al., 2011; Smyrak-Sikora et al., 2018). This implies another rapid reversal in regional plate tectonics movements from contraction to extension at ca. 365 Ma. Since regional plate tectonics reorganization and tectonic stress reorientation are known to be relatively slow and gradual processes, such abrupt switches are regarded as highly unlikely. Considering the extensional  
510 setting inferred in both the Early–Middle Devonian (Chorowicz, 1992; Piepjohn, 2000; Roy, 2007, 2009; Braathen et al., 2018, 2020; Dallmann and Piepjohn, 2020; Roy et al., unpublished) and mid Famennian–lower Permian (Cutbill et al., 1976; Aakvik, 1981; Gjelberg, 1984; Braathen et al., 2011; Smyrak-Sikora et al., 2018), it is more likely that Ellesmerian contraction never occurred in Svalbard and that the area was subjected to continuous extension throughout the Devonian–  
515 Carboniferous. This is also supported by late Silurian–Late Devonian extensional detachment faulting and folding at 430–368 Ma in northwestern Spitsbergen (Braathen et al., 2018) and in the Middle–Late Devonian in northern Spitsbergen (Chorowicz, 1992; Roy, 2007, 2009; Roy et al., unpublished).

The 383–365 Ma estimate for tentative Ellesmerian deformation in shallow-crustal Lower  
520 to lowermost Upper Devonian sedimentary rocks in central–northern Spitsbergen partly overlaps with the timing of deep-crustal, 373–355 Ma, amphibolite facies metamorphism in Prins Karls Forland (Majka and Kościńska, 2017; Faehnrich et al., 2017; Schneider et al., 2018; Kościńska et al., 2020) and thermal events in Oscar II Land at 377–326 Ma (Michalski et al., 2017). However, the 383–365 Ma estimate reflects the age of stratigraphy in central–northern Spitsbergen, not the  
525 age of any specific Ellesmerian structure. In addition, due to conflicting lines of evidence (e.g., postulated prograde metamorphism associated with normal sense of shear), the nature of tectonic stresses during tectonothermal events in Prins Karls Forland and Oscar II Land remains debatable.



Paleomagnetic and  $^{40}\text{Ar}$ – $^{39}\text{Ar}$  geochronological data from Michalski et al. (2017) do not support a pre-Caledonian link or proximity between the Pearya terrane and western Spitsbergen. On the same trend, detrital zircons in western and central Spitsbergen show affinities with northern Baltica rather than Laurentia in the Paleozoic (Gasser and Andresen, 2013). This suggests that western and central Spitsbergen were located away from the main Ellesmerian belt in northern Greenland and Arctic Canada and, thus, may have escaped Ellesmerian tectonism. This is further supported by the recent ~~discovery of~~ several kilometers thick, thousands of kilometers long, late Neoproterozoic thrust systems crosscutting the whole Barents Sea and the Svalbard Archipelago, thus suggesting that the Svalbard Archipelago was already accreted and attached to Baltica in the late Neoproterozoic (Koehl, 2020b; Koehl et al., 2022).

### Conclusion

There should be no debate as to the age of the Mimerdalen Subgroup and Billefjorden Group. These are respectively upper Givetian–lower Frasnian (ca. 385–380 Ma) and mid Famennian–Upper Mississippian (ca. 365–325 Ma). The single palynomorph specimen that was not in line with these ages was found in the Mimerdalen Subgroup is a clear misidentification of *Retispora lepidophyta*. Thus, the timing of Ellesmerian tectonism in central–northern Spitsbergen is constrained to 383–365 Ma. Nonetheless, because of the strong impact of Eureka strain partitioning and extensional detachment-related folding and faulting, much is left to do to quantify the impact, extent and timing of Ellesmerian tectonism in this area (~~if it ever occurred~~). Future studies should focus on geochronological dating of presumed Ellesmerian thrusts.

There is ~~also~~ no debate ~~either~~ about the age of the Adriabukta Formation in southern Spitsbergen. This formation is Middle Mississippian in age and is therefore a time-equivalent of the undeformed, sandstone-rich Hornsundeneset Formation. Hence, folding in the Adriabukta Formation is entirely and exclusively ascribed to Eureka tectonism and the tight character of folding to strain partitioning in the early Cenozoic. Due to lack of robust minimum time constraints, the occurrence of Ellesmerian tectonism in southern Spitsbergen is ~~highly doubtful~~. Future studies could, if feasible, focus on establishing clear tectonic and stratigraphic relationships in Røkensåta.

Postulated prograde amphibolite-facies metamorphism at 373–355 Ma in pre-Caledonian basement rocks in Prins Karls Forland occurred at a depth of c. 15 kilometers and, thus, has no bearings on the nature of tectonic stress and associated deformation in shallow-crustal Devonian–



560 Mississippian sedimentary rocks. Top-SW to top-NW normal sense of shear along the dated shear zone suggests that this episode of postulated prograde metamorphism may actually be related to shallow-crustal, extensional collapse processes, possibly reflecting progressive burial and movements along the shear zone during the deposition of collapse sediments. Similar processes are well documented on the conjugate margin of Svalbard in northeastern Greenland, and in northwestern Spitsbergen, and these processes involve deep, late Caledonian, high-pressure  
565 metamorphism and shallow-crustal extensional detachments.

Considering the dominantly extensional tectonic settings inferred for shallow-crustal rocks in late Silurian to early Permian times and the multiple inconsistencies and contradicting lines of evidence associated to the Ellesmerian Orogeny throughout Svalbard, the accretion of Svalbard to Baltica as early as the late Neoproterozoic, and the two abrupt and rapid switches in tectonic stress  
570 orientation required in the Late Devonian to account for Ellesmerian tectonism, it is ~~much more likely~~ that the whole archipelago was subjected to continuous extension from the late Silurian to early Permian times and escaped Ellesmerian deformation.

#### Author contributions

575 JBPK wrote the manuscript and designed the figures (contribution: 50%). John E. A. Marshall and Gilda M. Lopes provided critical input and corrections to the manuscript and figures (contribution: 25% each).

#### Competing interests

580 The authors declare that they have no conflict of interest.

#### Acknowledgements

The present study is part of the ARCEX (Research Centre for Arctic Petroleum Exploration), SEAMSTRESS, and CEED projects (Centre for Earth Evolution and Dynamics). The  
585 author would like to thank all the persons from these institutions that are involved in this project.

#### Financial support



The present study was financed by the ARCEX (grant number 228107), SEAMSTRESS (grant number 287865), and CEED projects (grant number 223272) funded by the Research Council of Norway, the Tromsø Research Foundation, and six industry partners.

## References

- Aakvik, R.: Fasies analyse av Undre Karbonske kullførende sedimenter, Billefjorden, Spitsbergen, Ph.D. Thesis, University of Bergen, Bergen, Norway, 219 pp., 1981.
- 595 Allen, K. C.: Lower and Middle Devonian spores of north and central Vestspitsbergen, *Palaeontology*, 8, 678–748, 1965.
- Allen, K. C.: Further information on the Lower and Middle Devonian spores from Dickson Land, Spitsbergen, *Norsk Polarinstitutt Årbok 1971*, 7–15, 1973.
- Andresen, A., Bergh, S. G., Hansen, H., Kløvjan, O., Kristensen, S. E., Livbjerg, F., Lund, T., Mair, B. F., Midbøe, P. and Nøttvedt, A.: Geometry and structural development of the Billefjorden and Lomfjorden Fault Zones in the Isfjorden-Sabine Land Area, Spitsbergen, Abstract 18. Nordiske Geologiske Vintermøde, København, 33–34, 1988.
- 600 Andresen, A., Haremo, P., Swensson, E. and Bergh, S. G.: Structural geology around the southern termination of the Lomfjorden Fault Complex, Agardhdalen, east Spitsbergen, *Norsk Geol. Tidsskr.*, 72, 83–91, 1992.
- 605 Andresen, A., Bergh, S. G. and Haremo., P.: Basin inversion and thin-skinned deformation associated with the Tertiary transpressional west Spitsbergen Orogen, in: *Proceedings of the International Conference on Arctic Margins*, edited by: Thurston, D. K. and Fujita, K., Anchorage, Alaska, USA, September 1992, 161–166, 1994.
- 610 Augland, L. E., Andresen, A. and Corfu, F.: Age, structural setting, and exhumation of the Liverpool Land eclogite terrane, East Greenland Caledonides, *Lithosphere*, 2, 4, 267–286, 2010.
- Augland, L. E., Andresen, A. and Corfu, F.: Terrane transfer during the Caledonian orogeny: Baltican affinities of the Liverpool Land Eclogite Terrane in East Greenland, *Geol. Soc. London*, 168, 15–26, 2011.
- 615 Barnes, C. J., Walczak, K., Janots, E., Schneider, D. and Majka, J.: Timing of Paleozoic Exhumation and Deformation of the High-Pressure Vestgötabreen Complex at the Motalafjella Nunatak, Svalbard, *Minerals*, 10, 125, 2020.



- 620 Bergh, S. G. and Andresen, A.: Structural development of the Tertiary fold-and-thrust belt in east Oscar II Land, Spitsbergen, *Polar Res.*, 8, 217–236, 1990.
- Bergh, S. G. and Grogan, P.: Tertiary structure of the Sørkapp–Hornsund Region, South Spitsbergen, and implications for the offshore southern continuation of the fold-thrust Belt, *Norsk Geol. Tidsskr.*, 83, 43–60, 2003.
- 625 Bergh S. G., Braathen, A. and Andresen, A.: Interaction of Basement-Involved and Thin-Skinned Tectonism in the Tertiary Fold-Thrust Belt of Central Spitsbergen, Svalbard, *AAPG Bulletin*, 81, 637–661, 1997.
- Bergh, S. G., Maher Jr., H. D. and Braathen, A.: Tertiary divergent thrust directions from partitioned transpression, Brøggerhalvøya, Spitsbergen, *Norsk Geol. Tidsskr.*, 80, 63–82, 2000.
- 630 Bergh, S. G., Maher Jr., H. D. and Braathen, A.: Late Devonian transpressional tectonics in Spitsbergen, Svalbard, and implications for basement uplift of the Sørkapp–Hornsund High, *J. Geol. Soc. London*, 168, 441–456, 2011.
- Berry, C. M. and Marshall, J. E. A.: Lycopsid forests in the early Late Devonian paleoequatorial zone of Svalbard, *Geology*, 43, 1043–1046, 2015.
- 635 Birkenmajer, K.: Devonian, Carboniferous and Permian formations of Hornsund, Vestspitsbergen, *Studia Geologica Polonica*, 11, 47–123, 1964.
- Birkenmajer, K. and Morawski, T.: Dolerite intrusions of Wedel-Jarlsberg Land Vestspitsbergen, *Studia Geologica Polonica*, 4, 103–123, 1960.
- Birkenmayer, K. and Turnau, E.: Lower Carboniferous age of the so-called Wijde Bay Series in 640 Hornsund, Vestspitsbergen, *Nor. Polarinst. Årb.* 1961, 41–61, 1962.
- Braathen, A., Bælum, K., Maher Jr., H. D. and Buckley, S. J.: Growth of extensional faults and folds during deposition of an evaporite-dominated half-graben basin; the Carboniferous Billefjorden Trough, Svalbard, *Norsk Geol. Tidsskr.*, 91, 137–160, 2011.
- Braathen, A., Osmundsen, P. T., Maher Jr., H. D. and Ganerød, M.: The Keisarhjelmen detachment 645 records Silurian–Devonian extensional collapse in Northern Svalbard, *Terra Nova*, 30, 34–39, 2018.
- Braathen, A., Ganerød, M., Maher Jr., H., Myhre, P. I., Osmundsen, P. T., Redfield, T. and Serck, C.: Devonian extensional tectonics in Svalbard; Raudfjorden’s synclinal basin above the



- 650 Keisarhjelmen detachment, 34<sup>th</sup> Nordic Geological Winter Meeting, January 8<sup>th</sup>–10<sup>th</sup> 2020, Oslo, Norway, 2020.
- Brinkmann, L.: Geologie des östlichen zentralen Dickson Landes und Palynologie der Mimerdalen Formation (Devon), Spitzbergen. (Geology of eastern–central Dickson Land and palynology of the Mimerdalen Formation [Devonian], Spitsbergen.), unpublished Master's Thesis, University of Münster, Münster, Germany, 94 pp., 1997.
- 655 Buggisch, W., Piepjohn, K., Thiedig, F. and von Gosen, W.: A Middle Carboniferous Conodont Fauna from Blomstrandhalvøya (NW-Spitsbergen): Implications on the Age of Post-Devonian Karstification and the Svalbardian Deformation, *Polarforschung*, 62, 2/3, 83–90, 1994.
- Chalmers, J. A. and Pulvertaft, T. C. R.: Development of the continental margins of the Labrador Sea: a review, in: *Non-Volcanic Rifting of Continental Margins: A Comparison of Evidence from Land and Sea*, edited by: Wilson, R. C. L., Taylor, R. B. and Froitzheim, N., Geol. Soc. London, Spec. Publi., 187, 77–105, 2001.
- 660 Chauvet, A. and Séranne, M.: Extension-parallel folding in the Scandinavian Caledonides: implications for late-orogenic processes, *Tectonophysics*, 238, 31–54, 1994.
- 665 Chorowicz, J.: Gravity-induced detachment of Devonian basin sediments in northern Svalbard, *Norsk Geol. Tidsskr.*, 72, 21–25 1992.
- Clayton, G.: Mississippian miospores, in: *Palynology: principles and applications*, edited by: Jansonius, J. and McGregor, D.C., AASP Foundation, 2, 589–596, Salt Lake City, Utah, USA, 1996.
- 670 Clayton, G., Coquel, R., Doubinger, J., Gueinn, K. J., Loboziak, S., Owens, B. and Streel, M.: Carboniferous Miospores of Western Europe: illustration and zonation, *Meded. Rijks Geol. Dienst*, 29, 1–71, 1977.
- Cutbill, J. L. and Challinor, A.: Revision of the Stratigraphical Scheme for the Carboniferous and Permian of Spitsbergen and Bjørnøya, *Geol. Mag.*, 102, 418–439, 1965.
- 675 Cutbill, J. L., Henderson, W. G. and Wright, N. J. R.: The Billefjorden Group (Early Carboniferous) of central Spitsbergen, *Norsk Polarinst. Skr.*, 164, 57–89, 1976.
- Dallmann, W. K.: The structure of the Berzeliustinden area: evidence for thrust wedge tectonics in the Tertiary fold-and-thrust belt of Spitsbergen, *Polar Res.*, 6:2, 141–154, 1988.



- Dallmann, W. K.: Multiphase tectonic evolution of the Sørkapp–Hornsund mobile zone (Devonian, Carboniferous, Tertiary), Svalbard, Norsk Geol. Tidsskr., 72, 49–66, 1992.
- 680 Dallmann, W. K. and Piepjohn, K.: The structure of the Old Red Sandstone and the Svalbardian Orogenic Event (Ellesmerian Orogeny) in Svalbard, Norg. Geol. Unders. B., 15, 106 pp., 2020.
- Dallmann, W. K., Ohta, Y. and Andresen, A.: Tertiary Tectonics of Svalbard, Norsk Polarinstitutts Rapportserie, 46, 112 pp., 1988.
- 685 Dallmann, W. K., Andresen, A., Bergh, S. G., Maher Jr., H. D. and Ohta, Y.: Tertiary fold-and-thrust belt of Spitsbergen Svalbard, Norsk Polarinstitutts Meddelelser 128, 51 pp., 1993.
- Dallmann, W. K., Dypvik, H., Gjelberg, J. G., Harland, W. B., Johannessen, E. P., Keilen, H. B., Larssen, G. B., Lønøy, A., Midbøe, P. S., Mørk, A., Nagy, J., Nilsson, I., Nøttvedt, A., Olaussen, S., Pcelina, T. M., Steel, R. J. and Worsley, D.: Lithostratigraphic Lexicon of Svalbard, edited by: Dallmann, W. K., Norwegian Polar Institute, Polar Environmental Centre, Tromsø, Norway, 1999.
- Eide, J. R., Ree, R. and Rockman, P. O.: Final well report – 7816/12-1 July 1991, Norsk Hydro A.S., Harstad, Norway, 1991.
- 695 Embry, A. F.: Middle-Upper Devonian Clastic Wedge of the Arctic islands, in: Geology of the Innuitian Orogen and Arctic Platform of Canada and Greenland, edited by: Trettin, H. P., Geological Survey of Canada, Geology of Canada, 3, Geological Society of America, The Geology of North America, 1991.
- Embry, A. F. and Klovan, J. E.: The Middle-Upper Devonian Clastic Wedge of the Franklinian Geosyncline, Bulletin of Canadian Petroleum Geology, 24, 4, 485–639, 1976.
- 700 Evdokimov, A. N., Burnaeva, M. Yu., Radina, E. S. and Sirotkin, A. N.: The First Find of Kimberlitic Accessory Minerals in Mafic–Ultramafic Dikes in Spitsbergen, Doklady Earth Sciences, 407, 2, 275–279, 2006.
- Faehnrich, K., Schneider, D., Manecki, M., Czerny, J., Myhre, P. I., Majka, J., Kościńska, K., Barnes, C. and Maraszewska, M.: eureka deformation on Prins Karls Forland, Svalbard – new insights from Ar<sup>40</sup>/Ar<sup>39</sup> muscovite dating, Geophys. Res. Abstracts, 19, EGU General Assembly 2017, 23–28 April, Vienna, Austria, 2017.
- 705 Fossen, H., Teyssier, C. and Whitney, D. L.: Transtensional folding, Journal of Structural Geology, 56, 89–102, 2013.



- 710 Friend, P. F. and Moody-Stuart, M.: Sedimentation of the Wood Bay Formation (Devonian) of  
Spitsbergen: Regional analysis of a late orogenic basin, *Norsk Polarinst. Skr.*, 157, 80 pp.,  
1972.
- Friend, P. F., Heintz, N. and Moody-Stuart, M.: New unit terms for the Devonian of Spitsbergen  
and a new stratigraphical scheme for the Wood Bay Formation, *Polarinst. Årbok*, 1965, 59–  
715 64, 1966.
- Friend, P. F., Harland, W. B., Rogers, D. A., Snape, I. and Thornley, R. S.: Late Silurian and Early  
Devonian stratigraphy and probable strike-slip tectonics in northwestern Spitsbergen, *Geol.  
Mag.*, 134, 4, 459–479, 1997.
- Gasser, D. and Andresen, A.: Caledonian terrane amalgamation of Svalbard: detrital zircon  
720 provenance of Mesoproterozoic to Carboniferous strata from Oscar II Land, western  
Spitsbergen, *Geol. Mag.*, 150, 6, 1103–1126, 2013.
- Gayer, R. A., Gee, D. G., Harland, W. B., Miller, J. A., Spall, H. R., Wallis, R. H. and Winsnes, T.  
S.: Radiometric age determinations on rocks from Spitsbergen, *Norsk Polarinstitutt  
Skrifter*, 137, 43 pp., 1966.
- 725 Gee, D. G. and Moody-Stuart, M.: The base of the Old Red Sandstone in central north Haakon VII  
Land, Vestspitsbergen, *Polarinst. Årbok*, 1964, 57–68, 1966.
- Gee, D. G. and Page, L. M.: Caledonian terrane assembly on Svalbard: New evidence from  
 $^{40}\text{Ar}/^{39}\text{Ar}$  dating in Ny Friesland, *American Journal of Science*, 294, 1166–1186, 1994.
- Gilotti, J. A., Nutman, A. P. and Brueckner, H. K.: Devonian to Carboniferous collision in the  
730 Greenland Caledonides: U-Pb zircon and Sm-Nd ages of high-pressure and ultrahigh-  
pressure metamorphism, *Contrib. Mineral Petrol.*, 148, 216–235, 2004.
- Gjelberg, J. G.: Early–Middle Carboniferous sedimentation on Svalbard. A study of ancient  
alluvial and coastal marine sedimentation in rift- and strike-slip basins, Ph.D. Thesis,  
University of Bergen, Bergen, Norway, 306 pp., 1984.
- 735 Grantz, A. and May, S. D.: Summary Geologic Report for Barrow Arch Outer Continental Shelf  
(OCS) Planning Area, Chukchi Sea, Alaska, United States Department of the Interior,  
Geological Survey, 84-395, 1984.
- Haremo, P. and Andresen, A.: Tertiary décollements thrusting and inversion structures along  
Billefjorden and Lomfjorden Fault Zones, East Central Spitsbergen, in: *Structural and  
740 Tectonic Modelling and its Application to Petroleum Geology*, edited by: Larsen, R. M.,





- Brekke, H., Larsen, B. T. and Talleraas, E., Norwegian Petroleum Society (NPF) Special Publications, 1, 481–494, 1992.
- Haremo, P., Andresen, A., Dypvik, H., Nagy, J., Elverøi, A., Eikeland, T. A. and Johansen, H.: Structural development along the Billefjorden Fault Zone in the area between  
745 Kjellströmdalen and Adventdalen/Sassendalen, central Spitsbergen, *Polar Res.*, 8, 195–216, 1990.
- Harland, W. B.: Contribution of Spitsbergen to understanding of tectonic evolution of North Atlantic region, *AAPG Memoirs*, 12, 817–851, 1969.
- Harland, W. B. and Horsfield, W. T.: West Spitsbergen Orogen, in: *Mesozoic–Cenozoic orogenic belts*, edited by: Spencer, A. M., *Geol. Soc. London Spec. Publ.*, 4, 747–755, 1974.  
750
- Harland, W. B. and Wright, N. J. R.: Alternative hypothesis for the pre-Carboniferous evolution of Svalbard, *Norsk Polarinst. Skr.*, 167, 89–117, 1979.
- Harland, W. B., Cutbill, L. J., Friend, P. F., Gobbett, D. J., Holliday, D. W., Maton, P. I., Parker, J. R. and Wallis, R. H.: The Billefjorden Fault Zone, Spitsbergen – the long history of a  
755 major tectonic lineament, *Norsk Polarinst. Skr.*, 161, 1–72, 1974.
- Harland, W. B., Scott, R. A., Auckland, K. A. and Snape, I.: The Ny Friesland Orogen, Spitsbergen, *Geol. Mag.*, 129, 6, 679–708, 1992.
- [Harrison, J. C.](#): Melville Island’s salt-based fold belt, Arctic Canada, *Geological Survey of Canada Bulletin*, 472, 344 pp., 1995.
- 760 Harrison, J. C. and Brent, T. A.: Basins and fold belts of Prince Patrick Island and adjacent area, Canadian Arctic Islands, *Geological Survey of Canada Bulletin*, 560, 208 pp., 2005.
- Higgins, A. K., Soper, N. J. and Leslie, A. G.: The Ellesmerian and Caledonian Orogenic Belts of Greenland, *Polarforschung*, 68, 141–151, 2000.
- Hughes, N. F. and Playford, G.: Palynological reconnaissance of the Lower Carboniferous of  
765 Spitsbergen, *Micropaleontology*, 7, 1, 27–44, 1961.
- Jakobsson, M., Mayer, L., Coackley, B., Dowdeswell, J. A., Forbes, S., Fridman, B., Hodnesdal, H., Noormets, R., Pedersen, R., Rebesco, M., Schenke, H. W., Zarayskaya, Y., Accettella, D., Armstrong, A., Anderson, R. M., Bienhoff, P., Camerlenghi, A., Church, I., Edwards, M., Gardner, J. V., Hall, J. K., Hell, B., Hestvik, O., Kristoffersen, Y., Marcussen, C.,  
770 Mohammad, R., Mosher, D., Nghiem, S. V., Pedrosa, M. T., Travaglini, P. G., and



- Weatherall, P.: The International Bathymetric Chart of the Arctic Ocean (IBCAO) Version 3.0, *Geophys. Res. Lett.*, 39, L12609, <https://doi.org/10.1029/2012GL052219>, 2012.
- Kaiser, H.: Die Oberdevon-Flora der Bäreninsel 3. Mikoflora des höheren Oberdevons und des Unterkarbons, *Palaeontographica Abt. B*, 129, 71–124, 1970.
- 775 Kempe, M., Niehoff, U., Piepjohn, K. and Thiedig, F.: Kaledonische und svalbardische Entwicklung im Grundgebirge auf der Blomstrandhalvøya, NW-Spitzbergen, Münster. *Forsch. Geol. Paläont.*, 82, 121–128, 1997.
- Koehl, J.-B. P.: Devonian–Mississippian collapse and core complex exhumation, and partial decoupling and partitioning of Eurekan deformation as alternatives to the Ellesmerian Orogeny in Spitsbergen, *Solid Earth Discuss.*, 2020a.
- 780 Koehl, J.-B. P.: Impact of Timanian thrusts on the Phanerozoic tectonic history of Svalbard, Keynote lecture, EGU General Assembly, May 3<sup>rd</sup>–8<sup>th</sup> 2020, Vienna, Austria, 2020b.
- Koehl, J.-B. P.: Early Cenozoic Eurekan strain partitioning and decoupling in central Spitsbergen, Svalbard, *Solid Earth*, 12, 1025–1049, 2021.
- 785 Koehl, J.-B. P., Collombin, M., Taule, C., Christophersen, G. and Allaart, L.: Influence of WNW–ESE-striking faults on Devonian–Permian sedimentary rocks in Billefjorden and implications for Ellesmerian and Eurekan tectonic events, 2020. doi: 10.13140/RG.2.2.35857.97129
- Koehl, J.-B. P., Cooke, F. A. and Plaza-Faverola, A. A.: Formation of a transform-parallel oceanic core complex along an inherited Timanian thrust, and impact on gas seepage in the Fram Strait, TSG Annual Meeting, 5–8<sup>th</sup> January, 2021.
- 790 Koehl, J.-B. P., Magee, C., and Anell, I. M.: Impact of Timanian thrust systems on the late Proterozoic–Phanerozoic tectonic evolution of the Barents Sea and Svalbard, *Solid Earth*, 13, 85–115, 2022.
- 795 Koehl, J.-B. P., Stokmo, E. M. B. and Muñoz-Barrera, J. M.: On the Billefjorden Fault Zone in Garmdalen, central Spitsbergen, 2022 submitted.
- Koehl, J.-B. P., Allaart, L. and Noormets, R.: Devonian–Carboniferous extension and Eurekan inversion along a major WNW–ESE-striking fault system controlled by inherited basement fabrics in Billefjorden, 2022 in prep.



- 800 Kościńska, K., Spear, F. S., Majka, J., Faehnrich, K., Manecki, M., Piepjohn, K. and Dallmann, W. K.: Deciphering late Devonian–early Carboniferous  $P$ – $T$ – $t$  path of mylonitized garnet-mica schists from Prins Karls Forland, Svalbard, *J. Metamorph., Geol.*, 00, 1–23, 2020.
- Krabbendam, M. and Dewey, J. F.: Exhumation of UHP rocks by transtension in the Western Gneiss Region, Scandinavian Caledonides, in: *Continental Transpressional and*
- 805 *Transtensional Tectonics*, edited by: Holdsworth, R. E., Strachan, R. A. and Dewey, J. F., *Geol. Soc. London, Spec. Publi.*, 135, 159–181, 1998.
- Krajewski, K. P. and Stempień-Salek, M.: Overthrust Carboniferous strata (Sergeijevfjellet Formation) at Lidfjellet, NW Sørkapp Land, Spitsbergen, *Polish Polar Res.*, 24, 1, 61–72, 2003.
- 810 Kumar, N., Granath, J. W., Emmet, P. A., Helwig, J. A. and Dinkelman, M. G.: Stratigraphic and Tectonic Framework of the US Chukchi Shelf: Exploration Insights from a New Regional Deep-seismic Reflection Survey, in: *Arctic Petroleum Geology*, edited by: Spencer, A. M., Gautier, D., Stoupakova, A., Embry, A. F. and Sørensen, K., *Geol. Soc. London Memoirs*, 35, 1, 501–508, 2011.
- 815 Lane, L. S.: Devonian–Carboniferous paleogeography and orogenesis, northern Yukon and adjacent Arctic Alaska, *Can. J. Earth Sci.*, 44, 679–694, 2007.
- Larsen, B. T.: Tertiary thrust tectonics in the east of Spitsbergen, and implications for the plate-tectonic development of the North-Atlantic, in: *Tertiary Tectonics of Svalbard*, edited by: Dallmann, W. K., Ohta, Y. and Andresen, A., *Norsk Polarinstitutt Rapportserie*, 46, 85–88,
- 820 1988.
- Larsen, P.-H. and Benggaard, H.-J.: Devonian basin initiation in East Greenland: a result of sinistral wrench faulting and Caledonian extensional collapse, *J. Geol. Soc. London*, 148, 355–368, 1991.
- Larsen, P.-H., Olsen, H. and Clack, J. A.: The Devonian basin in East Greenland–Review of basin
- 825 evolution and vertebrate assemblages, *GSA Bull. Mem.*, 202, 273–292, 2008.
- Lindemann, F.-J., Volohonsky, E. and Marshall, J. E.: A bonebed in the Hørbybreen Formation (Famennian-Viséan) on Spitsbergen, *NGF Abstracts and Proceedings*, 1, Winter Meeting, Oslo, 8–10<sup>th</sup> January, 2013.



- 830 Lister, G. S. and Davis, G. A.: The origin of metamorphic core complexes and detachment faults  
formed during Tertiary continental extension in the northern Colorado River region,  
U.S.A., *Journal of Structural Geology*, 11, 1/2, 65–94, 1989.
- Lopes, G., Mangerud, G. and Clayton, G.: The palynostratigraphy of the Mississippian Birger  
Johnsonfjellet section, Spitsbergen, Svalbard, *Palynology*, 43:4, 631–649, 2019.
- Lopes, G., Mangerud, G., Clayton, G. and Vigran, J. O.: Palynostratigraphic reassessment of the  
835 Late Devonian of Bjørnøya, Svalbard, *Rev. Palaeobot. Palynol.*, 286, 104376, 2021.
- Lowell, J. D.: Spitsbergen Tertiary Orogenic Belt and the Spitsbergen Fracture Zone, *Geol. Soc.  
Am. Bul.*, 83, 3091–3102, 1972.
- Luchitskaya, M. V., Sokolov, S. D., Kotov, A. B., L. M. Natapov, Belousova, E. A. and Katkov,  
S. M.: Late Paleozoic Granitic Rocks of the Chukchi Peninsula: Composition and Location  
840 in the Structure of the Russian Arctic, *Geotectonics*, 49, 4, 243–266, 2015.
- Maher, H. D.: Structure and stratigraphy of the Midterhuken peninsula, Bellsund, west Spitsbergen,  
PhD Thesis, University of Wisconsin–Madison, Madison, USA, 437, 1984.
- Maher Jr., H. D.: Atypical rifting during the Carboniferous of the NW Barents Shelf, Report for  
Saga Petroleum, November 1996, 1996.
- 845 Maher Jr., H. D., Craddock, C. and Maher, K.: Kinematics of Tertiary structures in upper Paleozoic  
and Mesozoic strata on Midterhuken, west Spitsbergen, *GSA Bulletin*, 97, 1411–1421,  
1986.
- Maher Jr., H. D., Ringset, N. and Dallmann, W. K.: Tertiary structures in the platform cover strata  
of Nordenskiöld Land, Svalbard, *Polar Res.*, 7:2, 83–93, 1989.
- 850 Majka, J. and Kościńska, K.: Magmatic and metamorphic events recorded within the  
Southwestern basement province of Svalbard, *Arktos*, 3:5, 2017.
- Malyshev, N. A., Obmetko, V. V., Barinova, E. M. and Ikhsanov, B. I.: Tectonics of the  
sedimentary basins in the Russian sector of the Chuckchi Sea, in: *Proceedings of the  
International Conference on Arctic Margins VI*, edited by: Stone, D. B., Grikurov, G. E.,  
855 Glough, J. G., Oakey, G. N. and Thurston, D. K., May 2011, Fairbanks, Alaska, USA, 203–  
209, 2011.
- Manby, G. M. and Lyberis, N.: Tectonic evolution of the Devonian Basin of northern Spitsbergen,  
*Norsk Geol. Tidsskr.*, 72, 7–19, 1992.



- Manby, G. M. and Lyberis, N.: State of stress and tectonic evolution of the West Spitsbergen Fold Belt, *Tectonophys.*, 267, 1–29, 1996.
- 860 Manby, G. M., Lyberis, N., Chorowicz, J. and Thiedig, F.: Post-Caledonian tectonics along the Billefjorden fault zone, Svalbard, and implications for the Arctic region, *Geol. Soc. Am. Bul.*, 105, 201–216, 1994.
-  Marshall, J., Lindemann, F. J., Finney, S. and Berry, C.: A Mid Famennian (Late Devonian) spore assemblage from Svalbard and its significance, CIMP Meeting, Bergen, Norway, 17–18<sup>th</sup> September, 2015.
- 865 Marshall, J., Lindemann, F. J., Finney, S. and Berry, C.: A Mid Famennian (Late Devonian) spore assemblage from Svalbard and its significance, CIMP Meeting, Bergen, Norway, 17–18<sup>th</sup> September, 2015.
- McCann, A. J.: Deformation of the Old Red Sandstone of NW Spitsbergen; links to the Ellesmerian and Caledonian orogenies, in: *New Perspectives on the Old Red Sandstone*, edited by: Friends, P. F. and Williams, B. P. J., *Geol. Soc. London*, 180, 567–584, 2000.
- 870 McCann, A. J. and Dallmann, W. K.: Reactivation of the long-lived Billefjorden Fault Zone in north central Spitsbergen, Svalbard, *Geol. Mag.*, 133, 63–84, 1996.
- McClelland, W. C., Power, S. E., Gilotti, J. A., Mazdab, F. K. and Wopenka, B.: U-Pb SHRIMP geochronology and trace-element geochemistry of coesite-bearing zircons, North-East Greenland Caledonides, *GSA, Spec. Paper*, 403, 23–43, 2006.
- 875 Michaelsen, B.: *Strukturgeologie des svalbardischen Überschiebungs- und Faltengürtels im zentralen, östlichen Dickson Land, Spitzbergen (Structural geology of the Svalbardian fold-and-thrust belt in central–eastern Dickson Land, Spitsbergen)*, Master’s Thesis, University of Münster, Münster, Germany, 134 pp., 1998.
- Michaelsen, B., Piepjohn, K. and Brinkmann, L.: *Struktur und Entwicklung der svalbardischen Mimerelva Syncline im zentralen Dickson Land, Spitzbergen*, Münster. *Forsch. Geol. Paläont.*, 82, 203–214, 1997.
- 880 Michaelsen, B., Piepjohn, K. and Brinkmann, L.: *Struktur und Entwicklung der svalbardischen Mimerelva Syncline im zentralen Dickson Land, Spitzbergen*, Münster. *Forsch. Geol. Paläont.*, 82, 203–214, 1997.
- Michalski, K.: Palaeomagnetism of metacarbonates and fracture fills of Kongsfjorden islands (western Spitsbergen): Towards a better understanding of late- to post-Caledonian tectonic rotations, *Polish Polar Res.*, 39, 1, 51–75, 2018.
- 885 Michalski, K., Lewandowski, M. and Manby, G.: New palaeomagnetic, petrographic and <sup>40</sup>Ar/<sup>39</sup>Ar data to test palaeogeographic reconstructions of Caledonide Svalbard, *Geol. Mag.*, 149, 4, 696–721, 2012.
- Michalski, K., Manby, G., Nejbort, K., Domanska-Siuda, J. and Burzynski, M.: Using palaeomagnetism and isotopic data to investigate late to post-Caledonian tectonothermal



- 890 processes within the Western Terrane of Svalbard, *J. Geol. Soc., London*, 174, 572–590,  
2017.
- Murascov, L. G. and Mokin, Ju. I.: Stratigraphic subdivision of the Devonian deposits of  
Spitsbergen, *Polarinst. Skr.*, 167, 249–261, 1979.
- Newman, M. J., Burrow, C. J. and den Blaauwen, J. L.: The Givetian vertebrate fauna from the  
895 Fiskekløfta Member (Mimerdalen Subgroup), Svalbard. Part I. Stratigraphic and faunal  
review. Part II. Acanthodii, *Norw. J. Geol.*, 99, 1–16, 2019.
- Newman, M. J., Burrow, C. J. and den Blaauwen, J. L.: A new species of ischnacanthiform  
acanthodian from the Givetian of Mimerdalen, Svalbard, *Norw. J. Geol.*, 99, 4, 619–631,  
2020.
- 900 Newman, M. J., Burrow, C. J., den Blaauwen, J. L. and Giles, S.: A new actinopterygian  
*Cheirolepis jonesi nov. sp.* from the Givetian of Spitsbergen, Svalbard, *Norw. J. Geol.*, 101,  
202103, 2021.
- Oakey, G. N. and Chalmers, J. A.: A new model for the Paleogene motion of Greenland relative to  
North America: Plate reconstructions of the Davis Strait and Nares Strait regions between  
905 Canada and Greenland, *J. of Geophys. Res.*, 117, B10401, 2012.
- Ohta, Y., Dallmeyer, R. D. and Peucat, J. J.: Caledonian terranes in Svalbard, *GSA Spec. Paper*,  
230, 1–15, 1989.
- Ohta, Y., Krasil'shchikov, A. A., Lepvrier, C. and Teben'kov, A. M.: Northern continuation of  
Caledonian high-pressure metamorphic rocks in central-western Spitsbergen, *Polar Res.*,  
910 14, 3, 303–315, 1995.
- Osmundsen, P. T. and Andersen, T. B.: Caledonian compressional and late-orogenic extensional  
deformation in the Staveneset area, Sunnfjord, Western Norway, *Journal of Structural  
Geology*, 16, 10, 1385–1401, 1994.
- Osmundsen, P. T., Andersen, T. B., Markussen, S. and Svendby, A. K.: Tectonics and  
915 sedimentation in the hangingwall of a major extensional detachment: the Devonian  
Kvamshesten basin, western Norway, *Basin Res.*, 10, 213–234, 1998.
- Petersen, T. G., Thomsen, T. B., Olaussen, S. and Stemmerik, L.: Provenance shifts in an evolving  
Eurekan foreland basin: the Tertiary Central Basin, Spitsbergen, *J. of Geol. Soc.*, 173, 634–  
648, 2016.



- 920 Piepjohn, K.: The Svalbardian–Ellesmerian deformation of the Old Red Sandstone and the pre-Devonian basement in NW Spitsbergen (Svalbard), in: *New Perspectives on the Old Red Sandstone*, edited by: Friend, P. F. and Williams, B. P. J., Geol. Soc. London Spec. Publi., 180, 585–601, 2000.
- Piepjohn, K., and Dallmann, W. K.: Stratigraphy of the uppermost Old Red Sandstone of Svalbard  
925 (Mimerdalen Subgroup), *Polar Res.*, 33:1, 1998, 2014.
- Piepjohn, K. and von Gosen, W.: Structural transect through Ellesmere Island (Canadian Arctic): superimposed Palaeozoic Ellesmerian and Cenozoic Eurekan deformation, in: *Circum-Arctic Lithosphere Evolution*, edited by: Pease, V. and Coackley, B., Geol. Soc., London, Spec. Publi., 460, 2017. <https://doi.org/10.1144/SP460.5>
- 930 Piepjohn, K., Brinkmann, L., Dißmann, B., Grewing, A., Michaelsen, B. and Kerp, H.: Geologische und strukturelle Entwicklung des Devon im zentralen Dickson Land, Spitzbergen, *Münster. Forsch. Geol. Paläont.*, 82, 175–202, 1997.
- Piepjohn, K., Brinkmann, L., Grewing, A. and Kerp, H.: New data on the age of the uppermost ORS and the lowermost post-ORS strata in Dickson Land (Spitsbergen) and implications  
935 for the age of the Svalbardian deformation, in: *New Perspectives on the Old Red Sandstone*, edited by: Friend, P. F. and Williams, B. P. J., Geol. Soc. London Spec. Publi., 180, 603–609, 2000.
- Piepjohn, K., Thiedig, F. and Manby, G. M.: Nappe Stacking on Brøggerhalvøya, NW Spitsbergen, *Geol. Jb*, B 91, 55–79, 2001.
- 940 Piepjohn, K., von Gosen, W., Estrada, S. and Tessensohn, F.: Deciphering superimposed Ellesmerian and Eurekan deformation, Piper Pass area, northern Ellesmere Island (Nunavut), *Can. J. Earth Sci.*, 44, 1439–1452, 2007.
- Piepjohn, K., von Gosen, W., Tessensohn, F. and Saalman, K.: Ellesmerian fold-and-thrust belt (northeast Ellesmere Island, Nunavut) and its Eurekan overprint, in: *Geology of Northeast Ellesmere Island Adjacent to Kane Basin and Kennedy Channel, Nunavut*, edited by: Mayr, U., Geological Society of Canada Bulletin, 592, 285–303, 2008.
- 945 Piepjohn, K., von Gosen, W., Läufer, A., McClelland, W. C. and Estrada, S.: Ellesmerian and Eurekan fault tectonics at the northern margin of Ellesmere Island (Canadian High Arctic), *Z. Dt. Ges. Geowiss.*, 164, 1, 81–105, 2013.



- 950 Piepjohn, K., von Gosen, W., Tessensohn, F., Reinhardt, L., McClelland, W. C., Dallmann, W. D.,  
Gaedicke, C. and Harrison, J. C.: Tectonic map of the Ellesmerian and Eureka deformation  
belts on Svalbard, North Greenland, and the Queen Elizabeth Islands (Canadian Arctic),  
Arktos, 1:12, 7 pp., DOI 10.1007/s41063-015-0015-7, 2015.
- Platt, J. P.: Dynamics of orogenic wedges and the uplift of high-pressure metamorphic rocks, GSA  
955 Bull., 97, 1037–1053, 1986.
- Playford, G.: Lower Carboniferous microfloras of Spitsbergen, Part 1, Paleontology, 5, 3, 550–  
618, 1962.
- Playford, G.: Lower Carboniferous microfloras of Spitsbergen, Part 2, Paleontology, 5, 4, 619–  
678, 1963.
- 960 Playford, G.: Plant microfossils from the Upper Devonian and Lower Carboniferous of the Canning  
Basin, Western Australia, Palaeontographica Abt. B, 158, 1–71, 1976.
- Pčelina, T. M., Bogač, S. I. and Gavrilov, B. P.: Novye dannye po litostratigrafii devonskih  
otloženji rajona Mimerdalen arhipelaga Špicbergen (New data on the lithostratigraphy of  
the Devonian deposits of the region of Mimerdalen of the Svalbard Archipelago), in:  
965 Geologija osadocnogo cehla arhipelaga Špicbergen (Geology of the sedimentary blanket of  
the archipelago of Spitsbergen), edited by: Krasil'sčikov, A. A. and Mirzaev, M. N.,  
Leningrad: Sevmorgeologija, 7–19, 1986.
- Rey, P., Vanderhaeghe, O. and Teyssier, C.: Gravitational collapse of the continental crust:  
definition, regimes and modes, Tectonophys, 342, 435–449, 2001.
- 970 Rey, P., Teyssier, C., Kruckenberg, S. C. and Whitney, D. L.: Viscous collision in channel explains  
double domes in metamorphic core complexes, Geology, 39, 4, 387–390, 2011.
- Ripington, S. J., Scott, R. A., Smyth, H., Bogolepova, O. K. and Gubanov, A. P.: The Ellesmerian  
Orogeny: Fact of Fiction?, GeoCanada 2010, Working with the Earth, 10–14 May, Calgary,  
Alberta, Canada, 2010.
- 975 Roberts, D.: Devonian Tectonic Deformation in the Norwegian Caledonides and Its Regional  
Perspectives, Norg. Geol. Unders., 380, 85–96 1983.
- Roy, J.-C., L. G.: La géologie du fossé des Vieux Grès Rouges du Spitzberg (archipel du Svalbard,  
territoire de l'Arctique) – Synthèse stratigraphique, conséquences paléoenvironnementales  
et tectoniques synsédimentaires, Mémoires des sciences de la Terre de l'Université Pierre



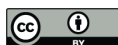

- 980 et Marie Curie, Ph.D. Thesis, Pierre and Marie Curie University, Paris, France, 2007-15,  
242 pp., 2007.
- Roy, J.-C.: La saga des vieux grès rouges du Spitzberg (archipel du Svalbard, Arctique): Une  
histoire géologique et naturelle, Charenton-le-pont: Auto-Edition Roy-Poulain, 290 pp.,  
2009.
- 985 Roy, J.-C., Chorowicz, J., Deffontaines, B., Lepvrier, C. and Tardy, M.: Clues of gravity sliding  
tectonics at the Eifelian–Givetian boundary in the Old Red Sandstone of the [late Silurian?]-  
Devonian trough of Andrée Land (Spitsbergen), in: La saga des vieux grès rouges du  
Spitzberg (archipel du Svalbard, Arctique): Une histoire géologique et naturelle, edited by:  
Charenton-le-pont: Auto-Edition Roy-Poulain, Norw. J. Geol., unpublished.
- 990 Schaltegger, U., Schmidt, A. K. and Horstwood, M. S. A.: U–Th–Pb zircon geochronology by ID-  
TIMS, SIMS, and laser ablation ICP-MS: Recipes, interpretations, and opportunities,  
Chem. Geol., 402, 89–110, 2015.
- Scheibner, C., Hartkopf-Fröder, C., Blomeier, D. and Forke, H.: The Mississippian (Lower  
Carboniferous) in northeast Spitsbergen (Svalbard) and a re-evaluation of the Billefjorden  
995 Group, Z. Dt. Ges. Geowiss., 163/3, 293–308, 2012.
- Schneider, D. A., Faehnrich, K., Majka, J. and Manecki, M.:  $^{40}\text{Ar}/^{39}\text{Ar}$  geochronologic evidence of  
Eurekan deformation within the West Spitsbergen Fold and Thrust Belt, in: Circum-Arctic  
Structural Events: Tectonic Evolution of the Arctic Margins and Trans-Arctic Links with  
Adjacent Orogens, edited by: Piepjohn, K., Strauss, J. V., Reinhardt, L. and McClelland,  
1000 W. C., GSA Special Paper, 541, 1–16, 2018.
- Schweitzer, H.-J.: Die Devonflora Spitzbergens (The Devonian flora of Spitsbergen),  
Palaeontographica Abteilung B Band, 252, Stuttgart, Schweizerbart Science Publishers,  
1999.
- Senger, K., Roy, S., Braathen, A., Buckley, S., Bælum, K., Gernigon, L., Mjelde, R., Noormets,  
1005 R., Ogata, K., Olaussen, S., Planke, S., Ruud, B. O. and Tveranger, J.: Geometries of  
doleritic intrusions in central Spitsbergen, Svalbard: an integrated study of an onshore-  
offshore magmatic province with applications to CO<sub>2</sub> sequestration, Norw. J. Geol., 93,  
143–166, 2013.
- Siedlecki, S.: Culm Beds of the SW. Coast of Hornsund, Studia Geologica Polonica, 4, 93–102,  
1010 1960.



- Siedlecki, S. and Turnau, E.: Palynological investigations of Culm in the area SW of Hornsund, Vestspitsbergen, *Studia Geologica Polonica*, 11, 125–138, 1964.
- Smyrak-Sikora, A. A., Johannessen, E. P., Olaussen, S., Sandal, G. and Braathen, A.: Sedimentary architecture during Carboniferous rift initiation – the arid Billefjorden Trough, Svalbard, *J. Geol. Soc. Lond.*, 176, 2, 225–252, 2018.
- 1015 Snoke, A. W.: Transition from infrastructure to suprastructure in the northern Ruby Mountains, Nevada, in: *Cordilleran Metamorphic Core Complexes*, edited by: Crittenden Jr., M. D., Coney, P. J. and Davis, G. H., *GSA Memoirs*, 153, 287–333, 1980.
- Stemmerik, L., Vigran, J. O. and Piasecki, S.: Dating of late Paleozoic rifting events in the North Atlantic: New biostratigraphic data from the uppermost Devonian and Carboniferous of East Greenland, *Geology*, 19, 218–221, 1991.
- 1020 Stemmerik, L., Dalhoff, D., Larsen, B. D., Lyck, J., Mathiesen, A. and Nilsson, I.: Wandel Sea Basin, eastern North Greenland, *Geol. Greenland Bull.*, 180, 55–62, 1998.
- Stemmerik, L., Late Palaeozoic evolution of the North Atlantic margin of Pangea, *Palaeogeogr., Palaeoclimatol., Palaeoecol.*, 161, 95–126, 2000.
- 1025 Strachan, R. A.: Evidence in North-East Greenland for Late Silurian–Early Devonian regional extension during the Caledonian orogeny, *Geology*, 22, 913–916, 1994.
- Teyssier, C., Ferré, E. C., Whitney, D. L., Norlander, B., Vanderhaeghe, O. and Parkinson, D.: Flow of partially molten crust and origin of detachments during collapse of the Cordilleran Orogen, in: *High-Strain Zones: Structure and Physical Properties*, edited by: Bruhn, D. and Burlini, L., *Geol. Soc. London, Spec. Publi.*, 245, 39–64, 2005.
- 1030 Thiedig, F. and Manby, G.: Origins and deformation of post-Caledonian sediments on Blomstrandhalvøya and Lovénøyane, northwest Spitsbergen, *Norsk Geol. Tidsskr.*, 72, 27–33, 1992.
- 1035 Trettin, H. P.: Early Paleozoic Evolution of Northern Parts of Canadian Arctic Archipelago, *AAPG Memoirs*, 19, 57–75, 1973.
- Trettin, H. P.: *Geology of the Innuitian Orogen and Arctic Platform of Canada and Greenland*, Geological Survey of Canada, *Geology of Canada*, 3, GSA, *The Geology of North America*, 1991.
- 1040 Vigran, J. O.: Spores from Devonian deposits, Mimerdalen, Spitsbergen, *Norsk Polarinstitutt Skrifter*, 132, 49 pp., 1964.



- Vogt, T.: The stratigraphy and tectonics of the Old Red formations of Spitsbergen, Abstracts of the Proceedings of the Geological Society London, 1343, 88, 1938.
- Von Gosen, W. and Piepjohn, K.: Polyphase Deformation in the Eastern Hornsund Area, Geol. Jb., 1045 B91, 291–312, 2001.
- Worsley, D. and Edwards, M. B.: The Upper Palaeozoic succession of Bjørnøya, Norsk Polarinst. Årbok, 1974, 17–34, 1976.
- Worsley, D. and Mørk, A.: The Triassic stratigraphy of southern Spitsbergen, Polarinst. Årbok, 1977, 43–60, 1978.
- 1050 Ziemiak, G., Majka, J., Manecki, M., Walczak, K., Jeanneret, P., Mazur, S. and Kościńska, K.: Early Devonian sinistral strike-slip in the Caledonian basement of Oscar II Land advocates for escape tectonics as a major mechanism for Svalbard terranes assembly, Geophys. Res. Abstr., EGU General Assembly, May 3<sup>rd</sup>–8<sup>th</sup> 2020, Vienna, Austria, 2020.

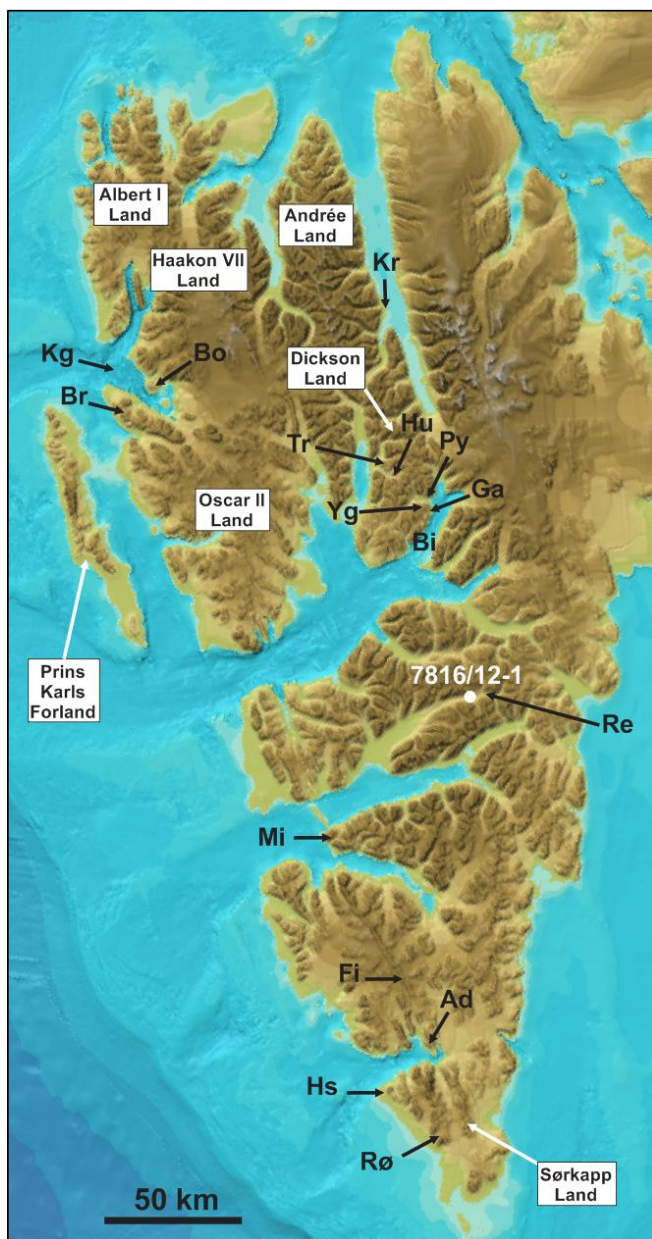

1055

**Figure 1:** Topographic–bathymetric map around Spitsbergen modified after Jakobsson et al. (2012). The location of exploration well 7816/12-1 is shown in white. Abbreviations: Ad: Adriabukta; Bi: Billefjorden; Bo: Blomstrandhalvøya; Br: Brøggerhalvøya; Fi: Fiskeknatten; Ga: Garmdalen; Hs: Hornsundneset; Hu: Hugindalen; Kg: Kongsfjorden; Kr: Krosspynten; Mi: Midterhuken; Re: Reindalspasset; Rø: Røkensåta; Tr: Triungen; Yg: Yggdrasilkampen.

1060

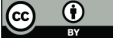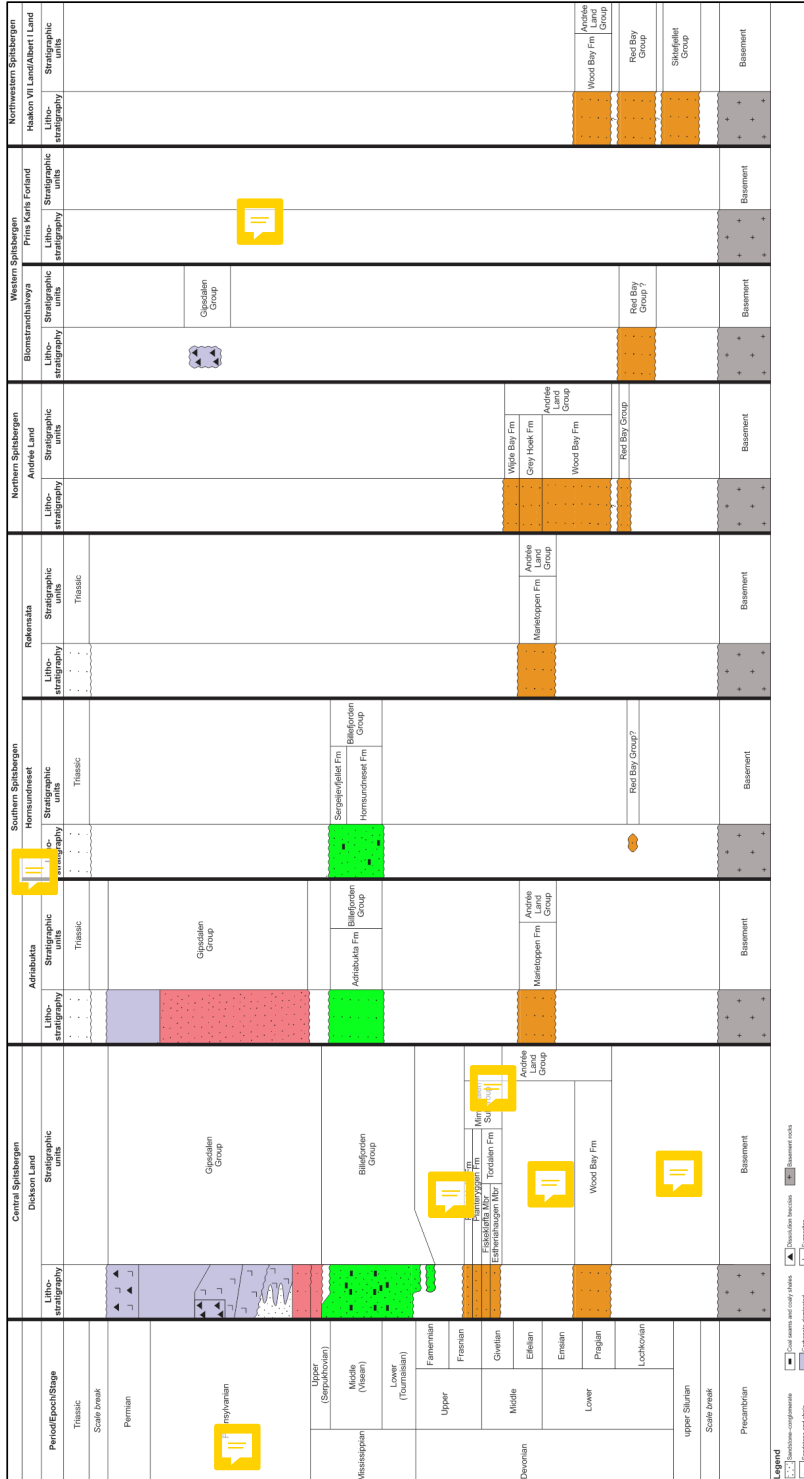

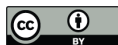

**Figure 2: Late Paleozoic stratigraphic chart of the areas discussed in the text.**
